# Improving Diagnostic Accuracy of Routine EEG for Epilepsy using Deep Learning

## Authors

Émile Lemoine<sup>1,2,3</sup>

Denahin Toffa<sup>1,3</sup>

An Qi Xu<sup>3</sup>

Jean-Daniel Tessier<sup>1,3</sup>

Mezen Jemel<sup>1,3</sup>

Frédéric Lesage<sup>2</sup>

Dang K. Nguyen<sup>1,3†</sup>

Elie Bou Assi<sup>1,3†\*</sup>

<sup>1</sup>Department of Neuroscience, Université de Montréal, Canada

<sup>2</sup>Institute of biomedical engineering, Polytechnique Montréal, Canada

<sup>3</sup>Centre de Recherche du Centre hospitalier de l'Université de Montréal (CRCHUM), Canada

†These authors should be considered co-senior authors

\*Corresponding author

**Corresponding author:** Elie Bou Assi, 1051 rue Sanguinet, Montréal, Québec. H2X 3E4

**Declarations:** EL is supported by a scholarship from the Canadian Institutes of Health Research (CIHR) and the Fonds de Recherche du Québec–Santé (FRQS). DKN and FL are supported by the Canada Research Chairs Program, the CIHR, and Natural Sciences and Engineering Research Council of Canada. DKN reports unrestricted educational grants from UCB and Eisai, and research grants for investigator-initiated studies from UCB and Eisai. EBA is supported by the Institute for Data Valorization (IVADO, 51628), the CHUM research center (51616), the Brain Canada Foundation (76097), and the FRQS. None of the authors declare any conflict of interest. The funding sources were not involved in study design, data collection, analysis, redaction, nor decision to submit this paper for publication.

**Word count of manuscript:** 3,821

## Abstract (350 words)

**Background and Objectives:** The diagnostic yield of routine EEG in epilepsy is limited by low sensitivity and the potential for misinterpretation of interictal epileptiform discharges (IEDs). Our objective is to develop, train, and validate a deep learning model that can identify epilepsy from routine EEG recordings, complementing traditional IED-based interpretation.

**Methods:** This is a retrospective cohort study of diagnostic accuracy. All consecutive patients undergoing routine EEG at our tertiary care center between January 2018 and September 2019 were included. EEGs recorded between July 2019 and September 2019 constituted a temporally shifted testing cohort. The diagnosis of epilepsy was established by the treating neurologist at the end of the available follow-up period, based on clinical file review. Original EEG reports were reviewed for IEDs. We developed seven novel deep learning models based on Vision Transformers (ViT) and Convolutional Neural Networks (CNN), training them to classify raw EEG recordings. We compared their performance to IED-based interpretation and two previously proposed machine learning methods.

**Results:** The study included 948 EEGs from 846 patients (820 EEGs/728 patients in training/validation, 128 EEGs/118 patients in testing). Median follow-up was 2.2 years and 1.7 years in each cohort, respectively. Our flagship ViT model, DeepEpilepsy, achieved an area under the receiver operating characteristic curve (AUROC) of 0.76 (95% CI: 0.69–0.83), outperforming IED-based interpretation (0.69; 0.64–0.73) and previous methods. Combining DeepEpilepsy with IEDs increased the AUROC to 0.83 (0.77–0.89).

**Discussion:** DeepEpilepsy can identify epilepsy on routine EEG independently of IEDs, suggesting that deep learning can detect novel EEG patterns relevant to epilepsy diagnosis. Further research is needed to understand the exact nature of these patterns and evaluate the clinical impact of this increased diagnostic yield in specific settings.

**Keywords:** Epilepsy – Electroencephalogram – Deep Learning – Diagnosis – Computer-assisted – Biomarker

**Word count (abstract):** 282

## 1 Introduction

2 The diagnosis of epilepsy is notoriously challenging. It relies on the occurrence of either two seizures  
3 more than 24h apart, one seizure and a high risk of another, or the presence of an epilepsy syndrome.<sup>1</sup>  
4 Despite this clear definition, the rate of misdiagnosis remains high.<sup>2,3</sup> A key issue is the lack of robust and  
5 validated interictal biomarkers,<sup>4-6</sup> making the diagnosis highly dependent on the ability to collect a clear  
6 clinical history and accurately interpret the electroencephalogram (EEG).

7 The EEG can capture ictal and interictal activity that is highly specific for epilepsy. It is cost-effective and  
8 technically straightforward, with standard acquisition protocols that have been put in place by the  
9 International League Against Epilepsy.<sup>7,8</sup> However, its diagnostic yield is hampered by low sensitivity<sup>9</sup>  
10 and only moderate interrater reliability.<sup>10</sup> Consequently, the EEG has limitations as a diagnostic tool in  
11 patients with suspected seizures, with EEG misinterpretation contributing to diagnostic errors in  
12 epilepsy.<sup>11</sup>

13 In recent decades, efforts have focused on overcoming the limitations of traditional EEG interpretation by  
14 identifying alternative epilepsy biomarkers within the EEG through computational methods.<sup>12-16</sup> More  
15 recently, Deep learning (DL) has since revolutionized the analysis of complex signals. DL models can  
16 autonomously extract features from time-series or images by optimizing millions of parameters on large  
17 datasets. DL has been applied to EEG to decode brain signals for brain-computer interface,<sup>17</sup> predict  
18 delirium,<sup>18</sup> and automatically detect IEDs.<sup>19,20</sup> Despite these advancements, studies that attempt to detect  
19 epilepsy on EEG remain disconnected from clinical practice, often using unrepresentative samples or  
20 lacking robust validation.<sup>13</sup> As a result, the true diagnostic accuracy of these approaches is uncertain, and  
21 clinical translation is still awaited.

22 Our group recently demonstrated that machine learning could predict the risk of seizures in the year  
23 following a routine EEG.<sup>21</sup> This method could also predict the diagnosis of epilepsy from the EEG alone  
24 with an area under the receiver operating characteristic curve (AUROC) of 0.63. The extraction of pre-

25 defined features has limited capacity to capture the complex brain dynamics underlying epilepsy, leading  
26 us to hypothesize that DL could substantially enhance these performances.

27 The present study builds on these findings and seeks to address these questions: can modern DL models  
28 detect epilepsy on interictal EEG, even in the absence of IEDs? What are the potential diagnostic  
29 performances of a DL-assisted EEG interpretation for epilepsy? And what sample size is required to train  
30 such models?

## 31 **Methods**

### 32 **Study design**

33 This is a retrospective study on a consecutive cohort of patients undergoing routine EEG in a single  
34 tertiary care center in Montreal, Canada.

### 35 **Participants**

36 We included all patients who underwent a routine EEG (20- to 60-minute, with or without sleep  
37 deprivation) between January 2018 and September 2019 at the Centre Hospitalier de l'Université de  
38 Montréal (CHUM). Exclusion criteria were the absence of follow-up after the EEG, an uncertain  
39 diagnosis of epilepsy at the end of the available follow-up period, or an EEG performed in a hospitalized  
40 patient. Under a prespecified protocol, one neurology resident (EL) and three students (AQ, MJ, JDT)  
41 collected data from the electronic health record for each visit, including baseline characteristics (age, sex),  
42 co-morbidities, number of antiseizure medications, and presence of a focal lesion on neuroimaging. They  
43 also reviewed the EEG report for the presence of IED(s) and abnormal background slowing. All clinical  
44 information was stored on a REDCap database hosted on the CHUM research center's servers.

45 We separated the cohort into two independent subsets according to the date of the EEG. Recordings  
46 before July 15, 2019, comprised the training and validation set, while recordings after July 15, 2019,  
47 comprised the testing set. We excluded from the testing set any recording from a patient already included

48 in the training and validation set. The training and validation set was further separated into a training set  
49 and a validation set in a random fashion (80%/20% split).

## 50 **Test Methods**

### 51 **Reference Standard**

52 The reference standard is the diagnosis of epilepsy according to the treating physician at the end of the  
53 available follow-up period. This diagnosis is based on the ILAE definition of epilepsy, i.e. having had  
54 two unprovoked seizures more than 24h apart or one unprovoked seizure and be considered at high (>  
55 60%) risk of seizure recurrence, or being diagnosed with an epilepsy syndrome.<sup>1</sup> The final diagnosis at  
56 the end of the follow up period was used, as opposed to the speculated diagnosis at the time of the EEG,  
57 because the follow up period provides additional information such as imaging, additional EEG  
58 recordings, video-monitoring admissions, and seizure recurrences.

### 59 **EEG recording**

60 EEGs were recorded using a standardized protocol on a Nihon Kohden EEG system, following national  
61 recommendations.<sup>22</sup> Awake EEGs, 20–30 minutes long, were recorded at 200 Hz with 19 electrodes  
62 arranged with the 10-20 system. They included two 90-second periods of hyperventilation (except in  
63 patients > 80 years old, uncooperative, or with medical contraindications) and photic stimulation from 4  
64 Hz to 22 Hz. Patients were also instructed to open or close their eyes at several times. Sleep deprived  
65 recordings lasted 60 minutes, with the same activation procedures. Technologists annotated the EEG in  
66 real-time. For this study, EEGs were converted to an average referential montage (A1-A2), saved to EDF  
67 format, and stored on the CHUM research center's server for analysis.

### 68 **Automated processing of EEG and classification**

69 The index test is the classification of the EEG recordings using machine learning. We developed  
70 DeepEpilepsy, a Vision Transformer (ViT) model that takes raw EEG segments as input and outputs a  
71 probability of the diagnosis of epilepsy (**Figure 1**). EEGs were segmented into overlapping 10- or 30-

72 second windows and directly used as input into the DL models. To enhance model generalization, we  
73 applied a random data augmentation algorithm during training.<sup>4</sup> For each segment, an augmentation was  
74 drawn randomly from a set of transformations, which included filtering (band-pass, low-pass, high-pass),  
75 masking (channel, time), and adding noise (**eFigure 1**). These were applied with a 50% probability and  
76 randomized intensity. We performed a Bayesian hyperparameter search on the training and validation set  
77 to choose DeepEpilepsy's final configuration. We also investigated different learning rates, weight decay,  
78 and batch size values. The final models were trained on the entire training and validation set. The  
79 optimization hyperparameters and model specifications are described in **eTable 4**.

80 In addition, we implemented other Deep Learning models (ViT and ConvNeXt), as well as two  
81 previously described methods: the ShallowConvNet inspired by the *Filter Bank Common Spatial Patterns*  
82 algorithm,<sup>23</sup> and a feature-extraction framework relying on the extraction of linear and nonlinear EEG  
83 markers that are used as input into a classifier (LightGBM).<sup>21</sup> These methods are described in details in  
84 **eMethods 1**.

85 To obtain the diagnostic performances, the final models/procedures were applied to the testing set. This  
86 resulted in a single predicted probability for each EEG segments. To obtain one prediction per EEG  
87 recording, we aggregated the predicted probabilities at the EEG-level using the median of the predicted  
88 values.

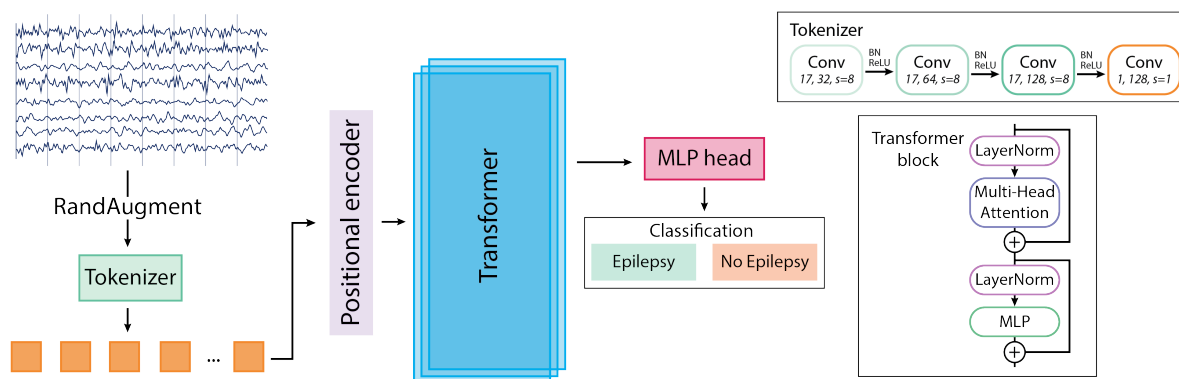

**Figure 1:** Details of the DeepEpilepsy Transformer model. The EEG is first processed through the RandAugm algorithm with 50% probability. A tokenizer is used (upper right: convolutional tokenizer) before positional encoding. The tokens are then input into a Transformer model. A MLP head classifies the embeddings from the Transformer according to the diagnosis of epilepsy. BN: Batch normalization; MLP: Multilayer perceptron; ReLU: Rectified linear unit.

89 We further evaluated DeepEpilepsy in a specific subgroup of patients which were not yet diagnosed with  
90 epilepsy at the time of the index EEG (i.e., undergoing evaluation for suspected seizures). We also  
91 measured the performance bias across different subgroups: age groups (18–40, 40–60, and >60 years old),  
92 sex, presence of focal lesion, presence of IED (absence, presence, and uncertain), presence of slowing,  
93 and number of ASM (0, 1,  $\geq 2$ ).

## 94 **Analysis**

95 We calculated the AUROC using the probabilistic predictions for each model, with 95% confidence  
96 intervals estimated using DeLong’s method (single prediction by patient).<sup>24</sup> For comparison, we tested the  
97 classification performance of IEDs alone (presence vs. absence). We also tested a two-step classification  
98 using IEDs first (traditional EEG interpretation), followed by DeepEpilepsy if IEDs were absent (DL  
99 interpretation).

100 The optimal classification threshold was obtained using the validation cohort, minimizing the distance  
101 between the curve and the upper left corner of the ROC graph. This threshold was then applied to  
102 compute sensitivity, specificity, negative predictive value, and positive predictive value on the testing set.  
103 We performed an exploratory analysis of the embeddings learned by DeepEpilepsy and ShallowConvNet  
104 to better understand the patterns captured by both models (**eMethods 2**).

## 105 **Sample size**

106 Using Obuchowski’s method,<sup>25</sup> with a 60% epilepsy prevalence, a power of 0.9, and a significance level  
107 of 0.0071 (adjusted from 0.05 divided by 7 DL models), a minimum of 126 EEGs is required to detect an  
108 AUROC of 0.70.

## 109 **Standard Protocol Approvals, Registrations, and Patient Consents**

110 Ethics approval was granted by the CHUM Research Centre’s Research Ethics Board (REB) (Montreal,  
111 Canada, project number: 19.334). The REB waived informed consent due to the lack of

112 diagnostic/therapeutic intervention and minimal risk to participants. All methods followed Canada's Tri-  
113 Council Policy statement on Ethical Conduct for Research Involving Humans.

## 114 **Code and Data Availability**

115 The code for the study will be available upon publication at the following address:

116 [https://gitlab.com/chum-epilepsy/dl\\_epilepsy\\_reeg](https://gitlab.com/chum-epilepsy/dl_epilepsy_reeg). Anonymized data will be made available to

117 qualified investigators upon reasonable request, conditional to the approval by our REB. The STARD

118 checklist is provided as Supplementary material.

## 119 **Results**

### 120 **Participants**

121 After exclusion, 948 EEGs from 846 patients were included: 820 EEGs in the training/validation set (728

122 patients) and 128 EEGs in the testing set (118 patients), with no patient overlap. Before exclusion, 1,185

123 EEGs from 1 067 patients and 161 EEGs from 149 patients met the inclusion criteria for the training and

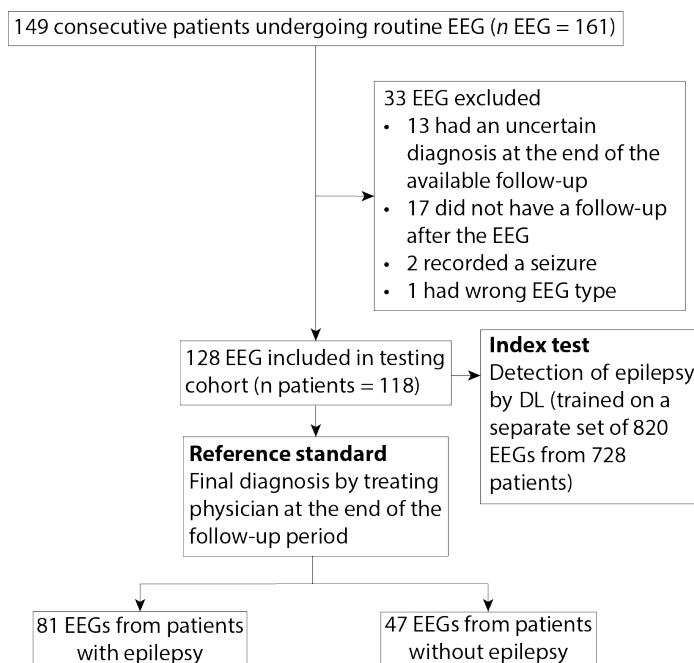

**Figure 2:** Flowchart of patients included in the testing cohort.



124 testing cohorts, respectively. Reasons for exclusion were absence of follow-up after the EEG, uncertain  
125 diagnosis at the end of available follow-up, seizure during the EEG, and wrong EEG type (i.e., performed  
126 in a hospitalized patient) (**Figure 2**). Median age were 49 and 51.5 (IQR: 32–62 and 30–62.5) and the  
127 proportion of women were 51% and 62.5% in the training and testing cohorts, respectively. Median  
128 follow-up was 2.2 years (IQR: 1.0–2.9) and 1.7 years (IQR: 0.9–2.3). Epilepsy prevalence was 63% in  
129 both sets.

130 In the testing cohort, 75 patients (64%) had an uncertain diagnosis at the time of the EEG, 28 of which  
131 were eventually diagnosed with epilepsy. In the 47 others, the most common final diagnoses were  
132 syncope/faintness (11), dementia-related fluctuations (6), and non-specific sensitive symptoms (5). In  
133 EEGs from patients finally diagnosed with epilepsy, 10 showed IEDs and 6 had uncertain sharp transients  
134 (vs. 1 in patients without epilepsy). This subgroup is detailed in **eTable 5**.

## 135 Test Results

136 The AUROC for the diagnosis of epilepsy in the testing cohort for every approach is pictured in **Figure 3**.  
 137 For DeepEpilepsy, the AUROC was 0.76 (95%CI: 0.69–0.83). Using the threshold computed on the  
 138 validation cohort (0.86), there were 75 true positives, 38 true negatives, 13 false positive, and 41 false  
 139 negatives, equating to a sensitivity of 64.7%, a specificity of 74.5%, a positive predicted value (PPV) of  
 140 85.2%, and a negative predictive value (NPV) of 48.1%. For comparison, when using the presence of  
 141 IEDs on EEG (as per the EEG report) as the index test, the sensitivity is 37.0%, specificity is 100.0%,  
 142 PPV is 100.0%, and NPV is 41.1%, with an AUROC of 0.69 (95% CI: 0.64–0.73). The AUROC of  
 143 DeepEpilepsy was higher than any other method, although this was only statistically significant when  
 144 compared to the ShallowConvNet models (AUROC: 0.60, 95%CI: 0.50–0.69). The diagnostic  
 145 performances of all methods are shown in **Table 2**.

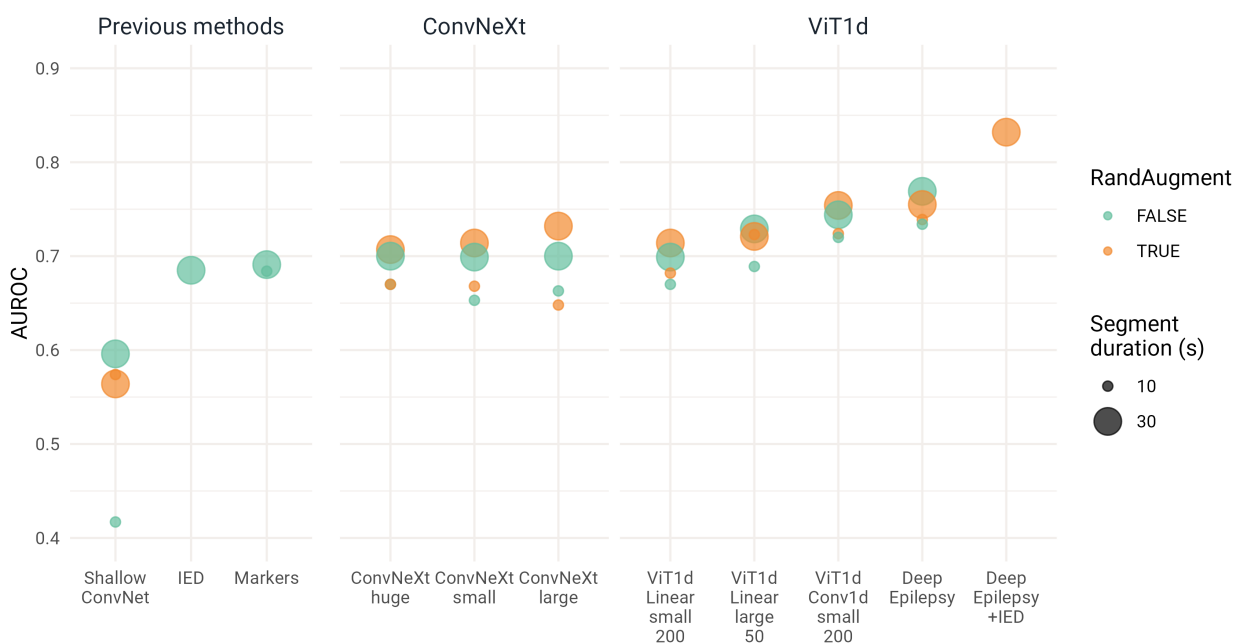

**Figure 3:** Diagnostic performances of automated EEG analysis for the diagnosis of epilepsy. Our flagship model, DeepEpilepsy, is shown alone and combined with traditional EEG interpretation based on the identification of IED. The other novel approaches shown are ViTs and ConvNeXt using different configurations (size: small, large, huge; tokenizers: convolutional or linear; window size: 50 pt or 200 pt) as well as presence of RandAugm and the duration of EEG segments used as input. Previous methods are the ShallowConvNet,<sup>23</sup> extraction of computational markers,<sup>21</sup> and the presence of IEDs on EEG. AUROC: Area under the receiver operating characteristic curve; IED: interictal epileptiform discharges; ViT: Vision Transformers.

146 When using the two-step model as the index test (1: presence of IED classified as epilepsy, 2: if no IED:  
147 DeepEpilepsy models prediction), the AUROC was 0.83 (95%CI: 0.77–0.89; **Figure 3**). The sensitivity,  
148 specificity, PPV, and NPV were 73.2%, 74.5%, 86.7%, and 55.1%.

#### 149 **Subgroup analyses**

150 In the subgroup of 77 patients not diagnosed with epilepsy at the time of the EEG, DeepEpilepsy still had  
151 above-chance performances (AUROC: 0.69, 95%CI 0.56–0.80), and the two-step model had the  
152 following performances: sensitivity of 65.6%, specificity of 76%, PPV of 63.6% and NPV of 77.6%, with  
153 an AUROC of 0.77 (0.65–0.87). The ROC curves for IEDs only, DeepEpilepsy, and DeepEpilepsy  
154 combined with IEDs for this subgroup are shown in **Figure 4**.

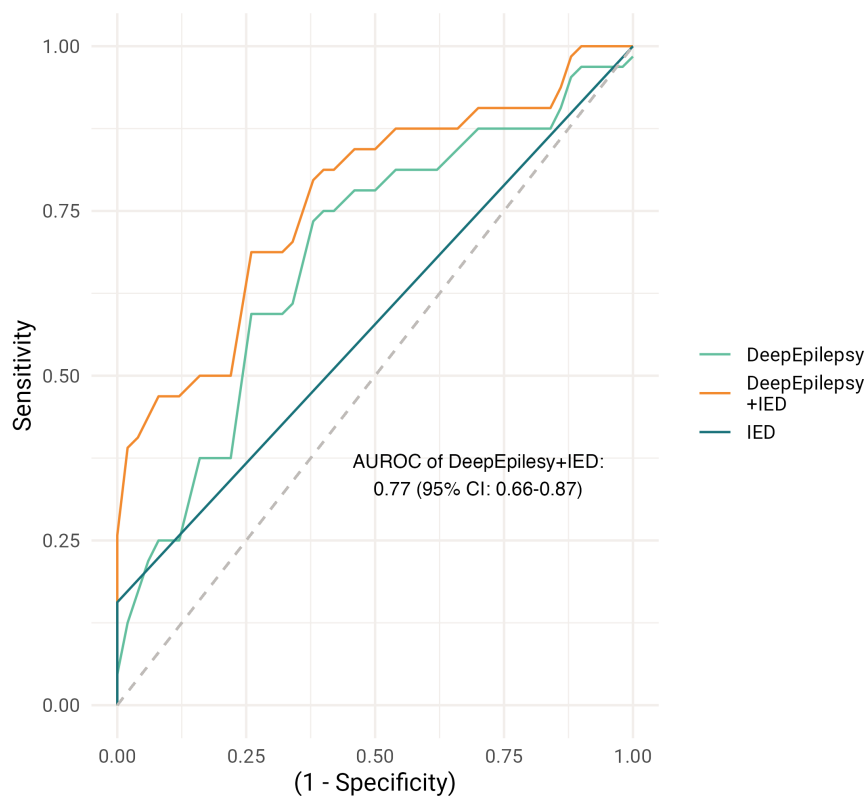

**Figure 4:** ROC curves for IEDs only, DeepEpilepsy, and DeepEpilepsy combined with IEDs in the subgroup of patients not diagnosed with epilepsy at the time of the EEG ( $n = 77$ ). AUROC: Area under the receiver operating characteristic curve; IED: interictal epileptiform discharges.

155 The results for other subgroups are presented in **Figure 5**. Notably, in absence of IEDs, AUROC was 0.74  
156 (0.65–0.83). Across other subgroups, performances were above chance except for patients > 60 years old  
157 and patients with a single antiseizure medication.

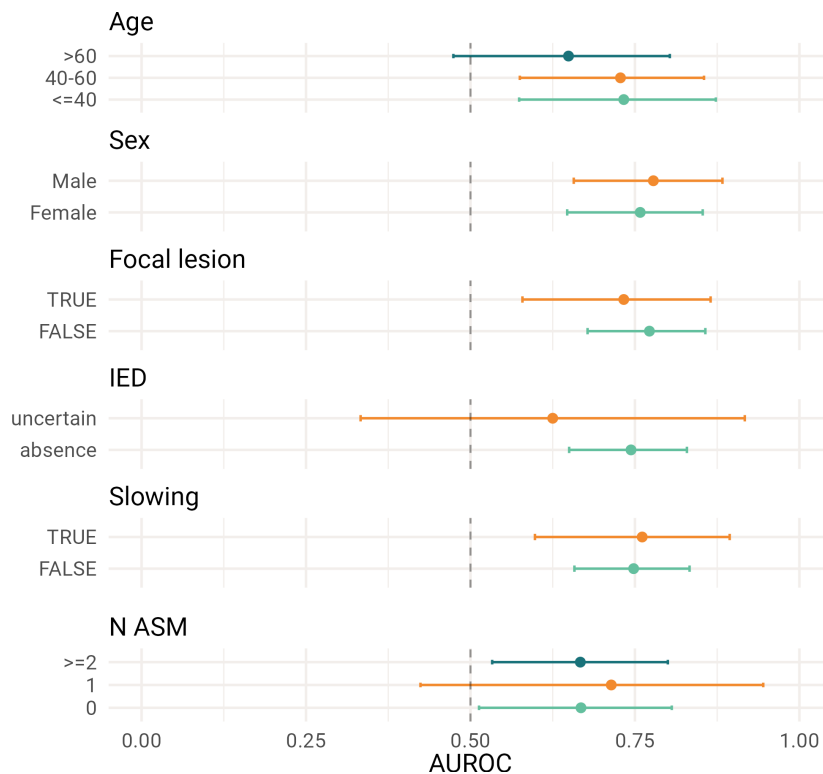

**Figure 5:** Performance of DeepEpilepsy for classification of epilepsy diagnosis from routine EEG in different subgroups of the testing set. ASM: Antiseizure medication; AUROC: Area under the receiver operating characteristic curve; IED: interictal epileptiform discharges.

## 158 **Sample size analysis**

159 We trained the different neural network models on subsets of the data (50, 100, 250, 500, and 750 EEGs)  
160 to assess the impact of the size of the training sample on performance (**Figure 6**). With 10-second  
161 segments, the ShallowConvNet had highest performances when trained on 250 EEG recordings. The  
162 other models tended towards increased performances, with a ceiling at 500 EEGs. Using 30-second  
163 segments, the ShallowConvNet showed a slight increase in performances with increased training size,  
164 with a maximal AUROC of 0.6 at 750 EEGs. In contrast, the performance of the ConvNeXt and ViT  
165 models increased almost linearly with sample size, achieving the highest performances with 750 EEGs. In  
166 almost all cases, 500 EEGs was the minimal training size required to achieve above-chance performances.

167 For reference, using our segmentation strategy, 500 EEGs resulted in 765,000 10-second overlapping  
 168 segments or 500,000 30-second overlapping segments.

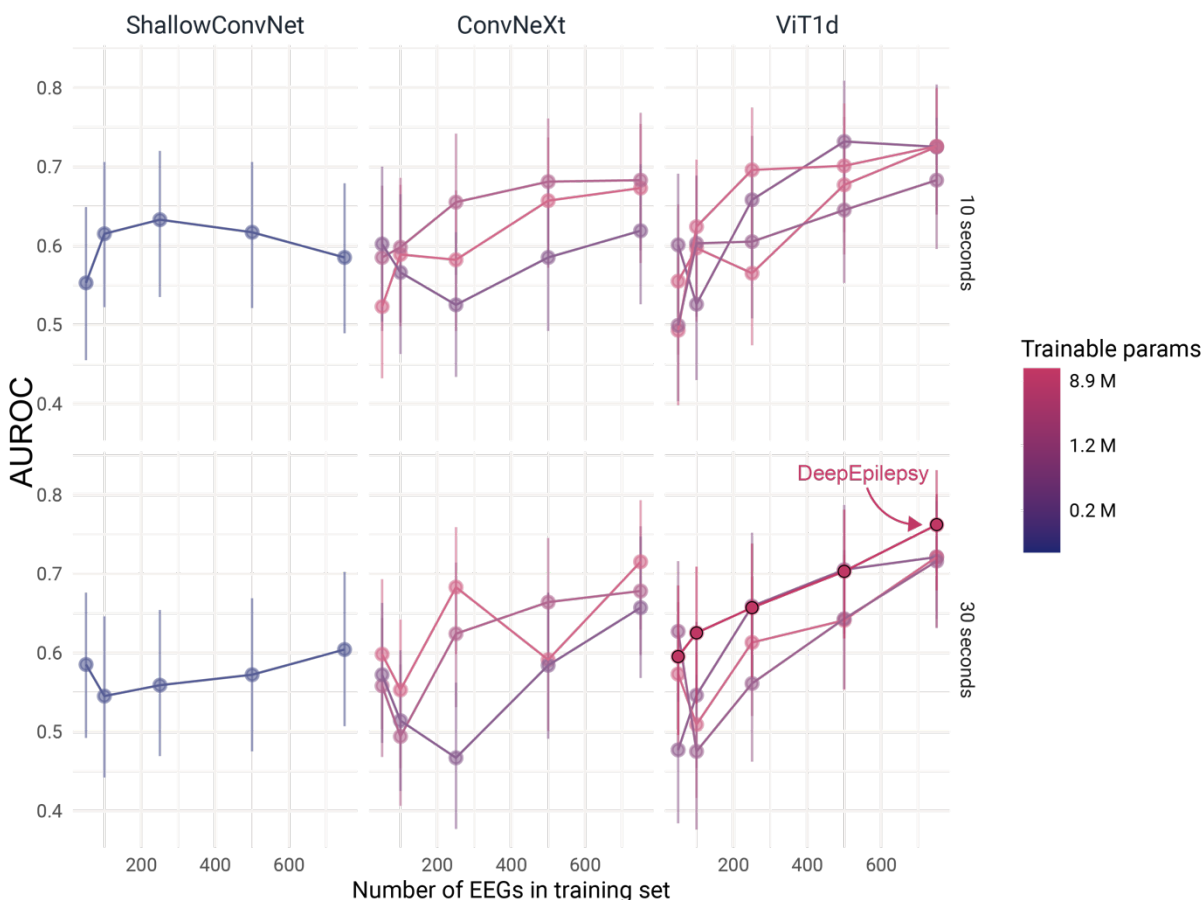

**Figure 6:** Impact of training sample size on the performance of four deep learning models (ShallowConvNet, ConvNeXt, ViT1d, and DeepEpilepsy) for detecting epilepsy from EEG segments. Performance is measured by the AUROC score, with models trained on varying numbers of EEGs (50, 100, 250, 500, and 750). The models were trained on 10s (top row) and 30s (bottom row) overlapping EEG segments. AUROC: Area under the receiver operating characteristic curve; IED: interictal epileptiform discharges; ViT: Vision Transformers.

## 169 Relationship between learned representations and traditional EEG features

170 We analyzed the band power and entropy of EEG segments in relation to their distribution in latent space  
 171 of Deep Epilepsy and ShallowConvNet using a clustering algorithm. For band power, DeepEpilepsy  
 172 produced clusters with higher variance in the high-frequency range (> 13 Hz), particularly in the 20–40  
 173 Hz, 40–75 Hz, and 75–100 Hz bands. In contrast, ShallowConvNet exhibited relatively higher variance in  
 174 the low-frequency range (< 10 Hz) (**eFigure 2**). Although DeepEpilepsy showed significant heterogeneity  
 175 across all frequency bands, ShallowConvNet had non-significant analysis of variance in the 20–40 Hz

176 range ( $p = 0.24$ ) Regarding entropy, both models showed significant heterogeneity across all frequencies,  
177 but ShallowConvNet displayed higher inter-cluster variance, especially for bands above 1.6 Hz,  
178 suggesting that this was a key feature learned by this model (**eFigure 3**).

## 179 **Discussion**

180 This study assessed the diagnostic performance of DL-based analysis of routine EEG for epilepsy. We  
181 developed and trained the DL models on 948 consecutive EEGs from 846 patients, testing them on a  
182 temporally shifted cohort of 128 EEGs from 118 patients. Our flagship model, DeepEpilepsy, had a  
183 testing AUROC of 0.76 (95%CI: 0.69–0.83), outperforming other methods including conventional IED-  
184 based interpretation and previously proposed computational methods. Combining the presence of IEDs  
185 with DL analysis increased the AUROC to 0.83 (95%CI: 0.77–0.89), demonstrating a potential for  
186 clinical translation.

187 Epilepsy diagnosis is primarily clinical, guided by individualized seizure recurrence risk assessment,  
188 which can be challenging due to limited reliable data.<sup>1</sup> The identification of IEDs on rEEG is commonly  
189 used to support the diagnosis of epilepsy, but their low sensitivity and risk of over-interpretation can often  
190 lead to both over- or underdiagnosis.<sup>11</sup> In our study, IEDs had an AUROC of 0.69 with a sensitivity as  
191 low as 37%. Our DL models provided higher overall diagnostic performances from the EEG than IEDs.  
192 Combining both approaches allowed to leverage the model’s higher sensitivity and the high specificity of  
193 IEDs. Currently, no definitive, quantitative, non-ictal biomarkers have been validated for clinical use.<sup>1</sup>  
194 Although several studies have explored changes in the EEG such as shifts in band power<sup>15,26,27</sup> or changes  
195 in entropy,<sup>28,29</sup> many remain at the “proof-of-concept” stage, limited by case-control designs or  
196 inadequate validation.<sup>13</sup> More recent studies on computational analysis of EEG for the diagnosis of  
197 epilepsy have shown mixed results.<sup>12,30</sup> Unlike prior work,<sup>13</sup> our validation cohort corresponds to the  
198 group of patients in which the algorithm would be used in real-life, reducing bias in performance  
199 evaluation. Furthermore, the gold-standard in our study was based on a thorough review of clinical notes

200 with a median follow-up period of over two years, allowing the clinician to build a more complete clinical  
201 picture integrating seizure recurrence, imaging, video-EEG evaluations, or new clinical symptoms. This is  
202 in contrast with studies that based the diagnosis on the EEG report or a single clinical visit.<sup>13</sup> These  
203 methodological strengths reduce bias and represent key steps towards the clinical integration of  
204 automated EEG analysis.<sup>13</sup>

205 DeepEpilepsy is based on the Transformer architecture,<sup>31</sup> which has greatly advanced our capacity to  
206 model sequence data. Transformers have been adapted for EEG-based tasks such as eye-tracking,<sup>32</sup>  
207 seizure prediction,<sup>33,34</sup> and decoding of motor patterns.<sup>35</sup> A critical component in adapting Transformers to  
208 EEG is the tokenization method, which influences feature extraction and the timescales captured by the  
209 model. Previous studies have used separable convolutions as the tokenizer,<sup>37,40</sup> a popular approach in EEG  
210 models since the ShallowConvNet and EEGNet CNNs.<sup>17,41</sup> However, in our early experiments, we found  
211 this approach underperformed and was inefficient, leading us to discard it. In contrast to the original ViT  
212 model, which “patchified” the input signal with a linear, non-overlapping tokenizer,<sup>25</sup> we showed that a  
213 deep convolutional embedding results in higher performances. This improvement is likely due to the  
214 convolution’s inductive bias towards hierarchical dynamics across timescales and spatial scales.<sup>42</sup> The  
215 discrepancies between our findings and previous studies on Transformer-based EEG models probably  
216 arise, in part, from dataset size and complexity: our training dataset included over 1 million samples from  
217 more than 900 patients, while prior studies used significantly smaller training samples (15 000–80 000  
218 segments from 23–70 patients<sup>37–39,43</sup>) as well as shorter EEG segments (up to 50 000 points,<sup>37–39,43</sup>  
219 compared to our 114,000 points per segment).

220 A notable advantage of Transformers over CNNs is their scalability. DeepEpilepsy showed continual  
221 improvement as the size of the training sample increased, without hitting a performance ceiling. Recent  
222 studies have further demonstrated CNNs’ limitations in scaling to large EEG datasets.<sup>44</sup> The absence of a  
223 performance ceiling in DeepEpilepsy suggests potential for further improvements with larger datasets,  
224 motivating multicenter collaborations to expand the training sample.

225 Unlike other approaches to automated EEG interpretation,<sup>19,20</sup> DeepEpilepsy did not rely on IEDs. We  
226 hypothesize that DeepEpilepsy’s capacity to detect epilepsy may be linked to changes in the higher  
227 frequency spectrum (40–100 Hz). The gamma range hosts high-frequency oscillations (HFOs). While  
228 they may have a prognostic value in patients with refractory temporal lobe epilepsies,<sup>37,38</sup> HFOs are not  
229 captured by our frequency range. All models performed better with longer EEG segments (30s), a  
230 timescale typically outside of the scope of routine EEG interpretation, suggesting that the models may  
231 capture brain dynamics not traditionally considered and warranting further investigations.

232 Integrating DL models like DeepEpilepsy in the clinical workflow could enhance clinical decision-  
233 making by the increasing the information available in case of diagnostic uncertainty. For example, a  
234 positive prediction by the model in a patient with neurological events of uncertain significance and  
235 negative workup (no IEDs on EEG, no epileptogenic lesion on MRI) could increase the suspicion of  
236 epilepsy, prompting to more frequent follow-ups or repeat EEGs. Conversely, a patient with a low pre-test  
237 probability of epilepsy, absence of IEDs and a negative DL prediction could reduce clinical suspicion.  
238 Most likely, combined with advances in other domains such as text processing, imaging and genetics,<sup>44–46</sup>  
239 the automated EEG analysis will lead to a more comprehensive phenotyping of these patients and  
240 potentially lead to quantifying the seizure likelihood. This could also improve clinical trials in epilepsy,  
241 which are currently limited by self-reported and unreliable outcome measures.<sup>4,47</sup>

242 This study has limitations. Our data comes from a single center, and although routine EEG recording is  
243 standardized, variability in hardware, software, and technique may affect generalizability. Additionally, at  
244 our center, patients with a first unprovoked seizure presenting at the emergency department generally  
245 undergo their EEG there and not as outpatient, limiting their inclusion in our cohort. Another limitation is  
246 the use of the EEG report as a measure of whether an EEG contains IEDs, which could be biased as EEG  
247 readers are not blinded to the diagnosis. However, for patients which were “undiagnosed” at the time of  
248 the EEG, the limitation does not apply. Finally, subgroup analyses were limited by the relatively small  
249 sample size.



250 In conclusion, this study demonstrates that DeepEpilepsy, a Transformer model, could identify epilepsy  
251 on routine EEG independently of IEDs. The DL algorithm alone had an AUROC of 0.76, surpassing  
252 previously proposed methods, which was increased to 0.83 when combined with IEDs. Several questions  
253 remain such as the exact nature of brain dynamics captured by DeepEpilepsy, the optimal sample sizes for  
254 training the model, and the true clinical impact of this increased diagnostic yield in specific clinical  
255 settings.

## 256 **Acknowledgements**

257 We would like to acknowledge the work of the CHUM EEG technologists for their contribution to the  
258 recording of the EEGs. We would also like to thank Manon Robert and Véronique Cloutier for their help  
259 regarding the access to the EEG data and the submission to the ethics review board.

## 260 **Author contributions**

261 EL, DT, DKN, FL, and EBA conceived and planned the experiments. EL, AQX, MJ, and JDT collected  
262 the data. EL, AQX, MJ, JDT, and EBA had direct access and verified the underlying data. EL performed  
263 the experiments. EL, DT, DKN, FL, and EBA contributed to the interpretation of the results. EL wrote the  
264 first draft of the manuscript. All authors provided critical feedback and reviewed the manuscript.

## References

1. Fisher, R. S. *et al.* ILAE Official Report: A practical clinical definition of epilepsy. *Epilepsia* **55**, 475–482 (2014).
2. Scheepers, B., Clough, P. & Pickles, C. The misdiagnosis of epilepsy: findings of a population study. *Seizure* **7**, 403–406 (1998).
3. Leach, J. P., Lauder, R., Nicolson, A. & Smith, D. F. Epilepsy in the UK: Misdiagnosis, mistreatment, and undertreatment?: The Wrexham area epilepsy project. *Seizure* **14**, 514–520 (2005).
4. Fisher, R. S. Bad information in epilepsy care. *Epilepsy Behav* **67**, 133–134 (2017).
5. Chadwick, D. & Smith, D. The misdiagnosis of epilepsy. *BMJ* **324**, 495–496 (2002).
6. Chowdhury, F. A., Nashef, L. & Elwes, R. D. C. Misdiagnosis in epilepsy: a review and recognition of diagnostic uncertainty. *European Journal of Neurology* **15**, 1034–1042 (2008).
7. Peltola, M. E. *et al.* Routine and sleep EEG: Minimum recording standards of the International Federation of Clinical Neurophysiology and the International League Against Epilepsy. *Epilepsia* **64**, 602–618 (2023).
8. Klem, G. H., Lüders, H. O., Jasper, H. H. & Elger, C. The ten-twenty electrode system of the International Federation. The International Federation of Clinical Neurophysiology. *Electroencephalogr Clin Neurophysiol Suppl* **52**, 3–6 (1999).
9. Bouma, H. K., Labos, C., Gore, G. C., Wolfson, C. & Keezer, M. R. The diagnostic accuracy of routine electroencephalography after a first unprovoked seizure. *European Journal of Neurology* **23**, 455–463 (2016).
10. Jing, J. *et al.* Interrater Reliability of Experts in Identifying Interictal Epileptiform Discharges in Electroencephalograms. *JAMA Neurology* **77**, 49–57 (2020).
11. Greenblatt, A. S., Beniczky, S. & Nascimento, F. A. Pitfalls in scalp EEG: Current obstacles and future directions. *Epilepsy & Behavior* **149**, 109500 (2023).
12. Tait, L. *et al.* Estimating the likelihood of epilepsy from clinically noncontributory electroencephalograms using computational analysis: A retrospective, multisite case–control study. *Epilepsia* **65**, 2459–2469 (2024).
13. Lemoine, É. *et al.* Computer-assisted analysis of routine EEG to identify hidden biomarkers of epilepsy: A systematic review. *Computational and Structural Biotechnology Journal* **24**, 66–86 (2024).
14. Acharya, U. R., Vinitha Sree, S., Swapna, G., Martis, R. J. & Suri, J. S. Automated EEG analysis of epilepsy: A review. *Knowledge-Based Systems* **45**, 147–165 (2013).

15. Miyauchi, T., Endo, K., Yamaguchi, T. & Hagimoto, H. Computerized analysis of EEG background activity in epileptic patients. *Epilepsia* **32**, 870–881 (1991).
16. Larsson, P. G. & Kostov, H. Lower frequency variability in the alpha activity in EEG among patients with epilepsy. *Clin Neurophysiol* **116**, 2701–2706 (2005).
17. Schirrmester, R. T. *et al.* Deep learning with convolutional neural networks for EEG decoding and visualization. *Hum. Brain Mapp.* **38**, 5391–5420 (2017).
18. Mulkey, M. A., Huang, H., Albanese, T., Kim, S. & Yang, B. Supervised deep learning with vision transformer predicts delirium using limited lead EEG. *Sci Rep* **13**, 7890 (2023).
19. Jing, J. *et al.* Development of Expert-Level Automated Detection of Epileptiform Discharges During Electroencephalogram Interpretation. *JAMA Neurol* (2019) doi:10.1001/jamaneurol.2019.3485.
20. Tveit, J. *et al.* Automated Interpretation of Clinical Electroencephalograms Using Artificial Intelligence. *JAMA Neurology* (2023) doi:10.1001/jamaneurol.2023.1645.
21. Lemoine, É. *et al.* Machine-learning for the prediction of one-year seizure recurrence based on routine electroencephalography. *Scientific Reports* **13**, 12650 (2023).
22. Dash, D. *et al.* Update on Minimal Standards for Electroencephalography in Canada: A Review by the Canadian Society of Clinical Neurophysiologists. *Canadian Journal of Neurological Sciences / Journal Canadien des Sciences Neurologiques* **44**, 631–642 (2017).
23. Cubuk, E. D., Zoph, B., Shlens, J. & Le, Q. V. RandAugment: Practical automated data augmentation with a reduced search space. Preprint at <https://doi.org/10.48550/arXiv.1909.13719> (2019).
24. R. Schirrmester, L. Gemein, K. Eggenesperger, F. Hutter, & T. Ball. Deep learning with convolutional neural networks for decoding and visualization of EEG pathology. in *2017 IEEE Signal Processing in Medicine and Biology Symposium (SPMB)* 1–7 (2017). doi:10.1109/SPMB.2017.8257015.
25. DeLong, E. R., DeLong, D. M. & Clarke-Pearson, D. L. Comparing the Areas under Two or More Correlated Receiver Operating Characteristic Curves: A Nonparametric Approach. *Biometrics* **44**, 837–845 (1988).
26. Obuchowski, N. A. & McCLISH, D. K. Sample Size Determination for Diagnostic Accuracy Studies Involving Binormal Roc Curve Indices. *Statistics in Medicine* **16**, 1529–1542 (1997).
27. Pegg, E. J., Taylor, J. R. & Mohanraj, R. Spectral power of interictal EEG in the diagnosis and prognosis of idiopathic generalized epilepsies. *Epilepsy & Behavior* **112**, 107427 (2020).
28. Larsson, P. G., Eeg-Olofsson, O. & Lantz, G. Alpha frequency estimation in patients with epilepsy. *Clinical EEG and Neuroscience* **43(2)**, 97–104 (2012).
29. Burioka, N. *et al.* Approximate entropy of the electroencephalogram in healthy awake subjects and absence epilepsy patients. *Clin EEG Neurosci* **36**, 188–193 (2005).

30. Urigüen, J. A., García-Zapirain, B., Artieda, J., Iriarte, J. & Valencia, M. Comparison of background EEG activity of different groups of patients with idiopathic epilepsy using Shannon spectral entropy and cluster-based permutation statistical testing. *PLOS ONE* **12**, e0184044 (2017).
31. Faiman, I. *et al.* Limited clinical validity of univariate resting-state EEG markers for classifying seizure disorders. *Brain Communications* **5**, fcad330 (2023).
32. Vaswani, A. *et al.* Attention Is All You Need. (2017).
33. Yang, R. & Modesitt, E. ViT2EEG: Leveraging Hybrid Pretrained Vision Transformers for EEG Data. Preprint at <http://arxiv.org/abs/2308.00454> (2023).
34. Deng, Z. *et al.* EEG-based seizure prediction via hybrid vision transformer and data uncertainty learning. *Engineering Applications of Artificial Intelligence* **123**, 106401 (2023).
35. Hussein, R., Lee, S. & Ward, R. Multi-Channel Vision Transformer for Epileptic Seizure Prediction. *Biomedicines* **10**, 1551 (2022).
36. Song, Y., Zheng, Q., Liu, B. & Gao, X. EEG Conformer: Convolutional Transformer for EEG Decoding and Visualization. *IEEE Transactions on Neural Systems and Rehabilitation Engineering* **31**, 710–719 (2023).
37. Lawhern, V. J. *et al.* EEGNet: a compact convolutional neural network for EEG-based brain–computer interfaces. *J. Neural Eng.* **15**, 056013 (2018).
38. Dosovitskiy, A. *et al.* An Image is Worth 16x16 Words: Transformers for Image Recognition at Scale. *arXiv:2010.11929 [cs]* (2021).
39. Qian, S., Zhu, Y., Li, W., Li, M. & Jia, J. What Makes for Good Tokenizers in Vision Transformer? **14**, (2015).
40. Wan, Z. *et al.* EEGformer: A transformer–based brain activity classification method using EEG signal. *Frontiers in Neuroscience* **17**, (2023).
41. Kiessner, A.-K., Schirrmeister, R. T., Boedeker, J. & Ball, T. Reaching the ceiling? Empirical scaling behaviour for deep EEG pathology classification. *Comput Biol Med* **178**, 108681 (2024).
42. Wang, Z. *et al.* Prognostic Value of Complete Resection of the High-Frequency Oscillation Area in Intracranial EEG: A Systematic Review and Meta-Analysis. *Neurology* **102**, e209216 (2024).
43. Zweiphenning, W. *et al.* Intraoperative electrocorticography using high-frequency oscillations or spikes to tailor epilepsy surgery in the Netherlands (the HFO trial): a randomised, single-blind, adaptive non-inferiority trial. *The Lancet Neurology* **21**, 982–993 (2022).
44. Heyne, H. O. *et al.* Polygenic risk scores as a marker for epilepsy risk across lifetime and after unspecified seizure events. *Nat Commun* **15**, 6277 (2024).

45. Ghosh, S. *et al.* NeuroMorphix: A Novel Brain MRI Asymmetry-specific Feature Construction Approach For Seizure Recurrence Prediction. Preprint at <https://doi.org/10.48550/arXiv.2404.10290> (2024).
46. Beaulieu-Jones, B. K. *et al.* Predicting seizure recurrence after an initial seizure-like episode from routine clinical notes using large language models: a retrospective cohort study. *The Lancet Digital Health* **5**, e882–e894 (2023).
47. Buchhalter, J. *et al.* EEG parameters as endpoints in epilepsy clinical trials - An expert panel opinion paper. *Epilepsy Research* **187**, 107028 (2022).

## Figures: Titles and Legends

**Figure 1:** Details of the DeepEpilepsy Transformer model. The EEG is first processed through the RandAugm algorithm with 50% probability. A tokenizer is used (upper right: convolutional tokenizer) before positional encoding. The tokens are then input into a Transformer model. A MLP head classifies the embeddings from the Transformer according to the diagnosis of epilepsy. BN: Batch normalization; MLP: Multilayer perceptron; ReLU: Rectified linear unit.

**Figure 2:** Flowchart of patients included in the testing cohort.

**Figure 3:** Diagnostic performances of automated EEG analysis for the diagnosis of epilepsy. Our flagship model, DeepEpilepsy, is shown alone and combined with traditional EEG interpretation based on the identification of IED. The other novel approaches shown are ViTs and ConvNeXt using different configurations (size: small, large, huge; tokenizers: convolutional or linear; window size: 50 pt or 200 pt) as well as presence of RandAugm and the duration of EEG segments used as input. Previous methods are the ShallowConvNet,<sup>23</sup> extraction of computational markers,<sup>21</sup> and the presence of IEDs on EEG. AUROC: Area under the receiver operating characteristic curve; IED: interictal epileptiform discharges; ViT: Vision Transformers.

**Figure 4:** ROC curves for IEDs only, DeepEpilepsy, and DeepEpilepsy combined with IEDs in the subgroup of patients not diagnosed with epilepsy at the time of the EEG ( $n = 77$ ). AUROC: Area under the receiver operating characteristic curve; IED: interictal epileptiform discharges.

**Figure 5:** Performance of DeepEpilepsy for classification of epilepsy diagnosis from routine EEG in different subgroups of the testing set. ASM: Antiseizure medication; AUROC: Area under the receiver operating characteristic curve; IED: interictal epileptiform discharges.

## Tables

**Table 1:** Description of the training (EEG recordings between January 2018 and July 2019) and testing cohorts (EEG recordings between July and September 2019)

|                                                   | Training/validation cohort (n = 820) |                       | Testing cohort (n = 128) |                       |
|---------------------------------------------------|--------------------------------------|-----------------------|--------------------------|-----------------------|
|                                                   | Epilepsy                             | No Epilepsy           | Epilepsy                 | No Epilepsy           |
| Number of EEGs                                    | 517                                  | 303                   | 81                       | 47                    |
| Sex = woman (%)                                   | 259 (50.1)                           | 159 (52.5)            | 54 (66.7)                | 26 (55.3)             |
| Age (median [IQR])                                | 42.00 [29.00, 58.00]                 | 57.00 [41.00, 67.00]  | 37.00 [25.00, 57.00]     | 60.00 [50.50, 71.00]  |
| Total follow-up after EEG in weeks (median [IQR]) | 133.50 [95.75, 173.00]               | 59.00 [17.00, 116.00] | 99.50 [70.25, 125.00]    | 62.00 [17.00, 102.00] |
| Epilepsy type (%)                                 |                                      |                       |                          |                       |
| Focal                                             | 370 (71.6)                           | –                     | 49 (60.5)                | –                     |
| Generalized                                       | 119 (23.0)                           | –                     | 26 (32.1)                | –                     |
| Unknown                                           | 28 (5.4)                             | –                     | 6 (7.4)                  | –                     |
| Age of epilepsy onset (median [IQR])              | 22.00 [13.00, 40.00]                 | –                     | 23.00 [14.00, 48.00]     | –                     |
| Seizure recurrence after EEG (%)                  | 269 (52.0)                           | 0 (0.0)               | 44 (54.3)                | 0 (0.0)               |
| Number of days since last seizure (median [IQR])  | 237 [56, 1134]                       | –                     | 118 [44, 467]            | –                     |
| Number of epilepsy risk factors (median [IQR])    | 3 [1, 4]                             | 2 [1, 4]              | 2 [1, 3]                 | 1 [0, 3]              |
| History of epilepsy surgery (%)                   | 60 (11.6)                            | 0 (0.0)               | 4 (4.9)                  | 0 (0.0)               |
| Number of ASM (%)                                 |                                      |                       |                          |                       |
| 0                                                 | 55 (10.6)                            | 253 (83.5)            | 17 (21.0)                | 42 (89.4)             |
| 1                                                 | 280 (54.2)                           | 36 (11.9)             | 34 (42.0)                | 5 (10.6)              |
| 2                                                 | 123 (23.8)                           | 12 (4.0)              | 19 (23.5)                | 0 (0.0)               |
| 3                                                 | 47 (9.1)                             | 2 (0.7)               | 6 (7.4)                  | 0 (0.0)               |
| 4                                                 | 10 (1.9)                             | 0 (0.0)               | 5 (6.2)                  | 0 (0.0)               |
| 5                                                 | 2 (0.4)                              | 0 (0.0)               | 0 (0.0)                  | 0 (0.0)               |
| Focal lesion on brain imaging (%)                 | 223 (43.1)                           | 84 (27.7)             | 31 (38.3)                | 10 (21.3)             |
| Sleep deprived EEG (%)                            | 62 (12.0)                            | 50 (16.5)             | 22 (27.2)                | 8 (17.0)              |
| IED (%)                                           |                                      |                       |                          |                       |
| Absence                                           | 333 (64.4)                           | 282 (93.1)            | 42 (51.9)                | 46 (97.9)             |
| Presence                                          | 139 (26.9)                           | 2 (0.7)               | 30 (37.0)                | 0 (0.0)               |
| Uncertain                                         | 45 (8.7)                             | 19 (6.3)              | 9 (11.1)                 | 1 (2.1)               |
| Abnormal slowing on EEG (%)                       | 199 (38.5)                           | 46 (15.2)             | 32 (39.5)                | 10 (21.3)             |

**Table 2:** Classification performances on the testing set for all machine learning methods

|                                  | Segment duration (s) | RandAugment | AUC               |
|----------------------------------|----------------------|-------------|-------------------|
| <b>DeepEpilepsy</b>              | 30                   | False       | 0.77 (0.69--0.84) |
| <b>DeepEpilepsy</b>              | 30                   | True        | 0.76 (0.68--0.83) |
| ViT1d, Conv tokenizer, small     | 30                   | True        | 0.75 (0.68--0.83) |
| ViT1d, Conv tokenizer, small     | 30                   | False       | 0.74 (0.66--0.82) |
| <b>DeepEpilepsy</b>              | 10                   | True        | 0.74 (0.66--0.81) |
| <b>DeepEpilepsy</b>              | 10                   | False       | 0.73 (0.64--0.81) |
| ConvNeXt, large                  | 30                   | True        | 0.73 (0.65--0.81) |
| ViT1d, Linear tokenizer, large   | 30                   | False       | 0.73 (0.65--0.80) |
| ViT1d, Conv tokenizer, small     | 10                   | True        | 0.72 (0.64--0.80) |
| ViT1d, Linear tokenizer, large   | 10                   | True        | 0.72 (0.64--0.80) |
| ViT1d, Linear tokenizer, large   | 30                   | True        | 0.72 (0.64--0.80) |
| ViT1d, Conv tokenizer, small     | 10                   | False       | 0.72 (0.64--0.80) |
| ConvNeXt, small                  | 30                   | True        | 0.71 (0.63--0.80) |
| ViT1d, Linear tokenizer, small   | 30                   | True        | 0.71 (0.63--0.79) |
| ConvNeXt, huge                   | 30                   | True        | 0.71 (0.62--0.79) |
| ConvNeXt, huge                   | 30                   | False       | 0.70 (0.61--0.78) |
| ConvNeXt, large                  | 30                   | False       | 0.70 (0.62--0.78) |
| ViT1d, linear tokenizer, small   | 30                   | False       | 0.70 (0.61--0.78) |
| ConvNeXt, small                  | 30                   | False       | 0.70 (0.61--0.78) |
| Feature extraction with LightGBM | 30                   | ---         | 0.69 (0.60--0.78) |
| ViT1d, Linear tokenizer, large   | 10                   | False       | 0.69 (0.60--0.76) |
| Feature extraction with LightGBM | 10                   | ---         | 0.68 (0.59--0.77) |
| ViT1d, linear tokenizer, small   | 10                   | True        | 0.68 (0.59--0.76) |
| ConvNeXt, huge                   | 10                   | False       | 0.67 (0.58--0.76) |
| ConvNeXt, huge                   | 10                   | True        | 0.67 (0.58--0.75) |
| ViT1d, linear tokenizer, small   | 10                   | False       | 0.67 (0.58--0.75) |
| ConvNeXt, small                  | 10                   | True        | 0.67 (0.58--0.76) |
| ConvNeXt, large                  | 10                   | False       | 0.66 (0.58--0.75) |
| ConvNeXt, small                  | 10                   | False       | 0.65 (0.57--0.74) |
| ConvNeXt, large                  | 10                   | True        | 0.65 (0.56--0.73) |
| ShallowConvNet                   | 30                   | False       | 0.60 (0.49--0.69) |
| ShallowConvNet                   | 10                   | True        | 0.57 (0.47--0.67) |
| ShallowConvNet                   | 30                   | True        | 0.56 (0.46--0.66) |
| ShallowConvNet                   | 10                   | False       | 0.42 (0.32--0.51) |
